# Supplementary material for: Metacognitive Therapy of Early Traumatized Patients With Borderline Personality Disorder: A Phase-II Baseline Controlled Trial
Source: PubMed Central journal article supplement (PMC6682682; doi:10.3389/fpsyg.2019.01694), 2019-07-30
Supplement: Table_1.pdf [file Table_1.pdf]

Table S1. An overview of outpatient treatments of borderline personality disorder since 2005: Duration, attrition, effect size and recovery rate

| Authors                 | Treatments   | N <sup>a</sup> | Duration of treatment (months) | Attrition <sup>b</sup> | Effect size <sup>c</sup> measure                            | ES Pre-post         | Recovery rate BPD | Duration of Follow-up (months) | ES Pre-follow-up    |
|-------------------------|--------------|----------------|--------------------------------|------------------------|-------------------------------------------------------------|---------------------|-------------------|--------------------------------|---------------------|
| Nordahl et al., 2005    | ST           | 6              | 22                             | 16%                    | YSQ, IIP, SCL-90, BDI                                       | 1.9                 | 50%               | 12                             | 1.8                 |
| Giesen-Bloo et al 2006  | ST           | 44             | 36                             | 27%                    | BPDSI (Interview; DSM-IV BPD psychopathology)               | 2.96 <sup>d</sup> * | 46%               | Na.                            | Na.                 |
|                         | TFP          | 42             |                                | 51%                    |                                                             | 1.85 <sup>d</sup> * | 24%               |                                |                     |
| Nadort et al 2009       | ST w/P       | 32             | 18                             | 22%                    | BPDSI (Interview; DSM-IV BPD psychopathology)               | 1.42 *              | 42%               | Na.                            | Na.                 |
|                         | SFT w/out P  | 30             |                                | 20%                    |                                                             | 1.82 *              | 43%               |                                |                     |
| Farrell et al 2009      | ST & TAU     | 16             | 8                              | 0%                     | DIB-R (Interview; DSM-IV BPD psychopathology)               | 2.31                | 94%               | 6                              | 2.37                |
|                         | TAU          | 12             |                                | 25%                    |                                                             | 0.47                | 16%               |                                |                     |
| Davidson et al 2006     | CBT          | 54             | 12                             | 3,7%                   | YSQ (Self-report; maladaptive schemas)                      | 0.84                | Na.               | 12                             | 0.79                |
|                         | TAU          | 52             |                                | 7,7%                   |                                                             | 0.42                |                   |                                |                     |
| Cottraux et al 2009     | CBT          | 33             | 12                             | 39%                    | YSQ (Self-report; maladaptive schemas)                      | 1.17                | Na.               | 12                             | 1.99 <sup>e</sup>   |
|                         | RST          | 32             |                                | 44%                    |                                                             | 1.10                |                   |                                |                     |
| Linehan et al 2006      | DBT          | 52             | 12                             | 19%                    | Suicide ideation (Self-report; suicide behaviour question.) | 0.97                | Na.               | 12                             | 1.36                |
|                         | ECP          | 49             |                                | 43%                    |                                                             | 1.13                |                   |                                |                     |
| McMain et al 2009       | DBT          | 90             | 12                             | 39%                    | ZAN-BPD (Interview; DSM-IV BPD psychopathology)             | 1.23                | Na.               | Na.                            | Na.                 |
|                         | GPM          | 90             |                                | 38%                    |                                                             | 1.09                |                   |                                |                     |
| Clarkin et al 2007      | TFP          | 30             | 12                             | 23%                    | Suicidality (Self-report; Overt aggression scale modified)  | 0.70 <sup>e*</sup>  | Na.               | Na.                            | Na.                 |
|                         | DBT          | 30             |                                | 43%                    |                                                             | 0.72 <sup>e*</sup>  |                   |                                |                     |
|                         | SUPT         | 30             |                                | 27%                    |                                                             | 0.37 <sup>e*</sup>  |                   |                                |                     |
| Doering et al 2010      | TFP          | 45             | 12                             | 29%                    | DSM-IV BPD Criteria (Interview; Scid-II)                    | 1.8 *               | 42%               | Na.                            | Na.                 |
|                         | ECP          | 39             |                                | 56%                    |                                                             | 1.4 *               | 15%               |                                |                     |
| Bateman et al 2009      | MBT          | 71             | 18                             | 27%                    | Hospital admission due to Suicidality and self-injury       | 1.29                | Na.               | Na.                            | Na.                 |
|                         | SCM          | 63             |                                | 25%                    |                                                             | 0.77                |                   |                                |                     |
| Gregory et al 2008/2010 | DPP          | 15             | 12                             | 33%                    | BEST (Self-report; severity of DSM-IV based symptoms)       | 1.43*               | Na.               | 18                             | 1.51                |
|                         | TAU          | 15             |                                | 40%                    |                                                             | 0.73*               |                   |                                |                     |
| Weinberg et al 2006     | MACT & TAU   | 15             | 2                              | 0%                     | Frequency of deliberate self-harm                           | 0.81                | Na.               | 6                              | 0.67                |
|                         | TAU          | 15             |                                | 0%                     |                                                             | 0.58                |                   |                                |                     |
| Blum et al 2008         | STEPPS & TAU | 65             | 5                              | 31%                    | ZAN-BPD (Interview; DSM-IV BPD psychopathology)             | 1.21 <sup>f</sup>   | Na.               | 12                             | 0.40 <sup>f,h</sup> |
|                         | TAU          | 59             |                                | 14%                    |                                                             | 0.53 <sup>f</sup>   |                   |                                |                     |
| Bos et al 2010          | STEPPS       | 42             | 4 ½                            | 21%                    | BDP-40 (self-report; DSM-IV BPD psychopathology)            | 1.06                | Na.               | 6                              | 1.18                |
|                         | TAU          | 37             |                                | 11%                    |                                                             | 0.19                |                   |                                |                     |
| Priebe et al., 2012     | DBT          | 40             | 12                             | 52%                    | DSH (Deliberate self-harm)                                  | 0.49                | Na.               | 6                              | Na.                 |
|                         | TAU          | 40             |                                | 15%                    |                                                             | 0.06                |                   |                                |                     |
| Bohus et al., 2013      | DBT          | 43             | 3                              | 5%                     | CAPS (Trauma symptoms) PDS (PTSD symptoms)                  | 1.50                | Na.               | 6                              | 1.73                |
|                         | TAU          | 39             |                                | 5%                     |                                                             | 0.10                |                   |                                |                     |
| Linehan et al., 2015    | DBT          | 33             | 12                             | 24%                    | Suicide attempts and NNSI (non-suicidal injury)             | Na. <sup>1</sup>    | Na.               | 12                             | Na.                 |
|                         | DBT-S        | 33             |                                | 39%                    |                                                             |                     |                   |                                |                     |
|                         | DBT-I        | 33             |                                | 48%                    |                                                             |                     |                   |                                |                     |

Notes: a) Number of patients randomized corrected for dropout prior to start of treatment; b) Attrition defined as loss due to training cases, drop-out, or not completing the treatment protocol; c) Effect sizes: Cohen's d with pooled SD, within-group calculations, pre-treatment vs. post-treatment or follow-up, bias corrected (Hedges); d) ES stated in paper based on medians; e) Transformed from r to d by the authors; f) SD calculated based on SE and N; g) ES based on completer analysis; N at follow-up (CBT = 10, RST = 11); h) Values for ZAN-BPD not given at follow-up, BEST used instead for ES. i) Measure was not available for measuring ES. \* ES (Cohen's d or r) was stated in the paper.

Abbreviations: ST = Schema Therapy; TFP = Transference-Focused Psychotherapy; DBT = Dialectical Behaviour Therapy; SUPT = Supportive Treatment; TAU = Treatment as usual; GPM = General psychiatric management; ECP = Experienced community psychotherapists; MBT = Mentalization-based treatment; SCM = Structured clinical management; DPP = Dynamic deconstructive psychotherapy; MACT = Manual assisted cognitive treatment; STEPPS = System training for emotional predictability and problem solving; BPDSI = Borderline personality disorder severity index, 4<sup>th</sup> ed.; DIB-R = Diagnostic Interview for BPD-revised; YSQ = Young schema questionnaire; ZAN-BPD = Zanarini rating scale for BPD; BEST = Borderline evaluation of severity over time; BDP-40 = BPD checklist - 40 items.

## References:

- Bateman, A., & Fonagy, P. (2009a). Randomized controlled trial of outpatient Mentalization-based treatment versus structured clinical management for borderline personality disorder. *American Journal of Psychiatry*, *166*, 1355-1364.
- Bateman, A., & Fonagy, P. (2009b). Randomized controlled trial of outpatient Mentalization-based treatment versus structured clinical management for borderline personality disorder: Supplementary data. *American Journal of Psychiatry*, Retrieved September, 10, 2010, from <http://ajp.psychiatryonline.org/cgi/data/appi.ajp.2009.09040539/DC1/1>.
- Blum, N., St. John, D., Pfohl, B., Stuart, S., McCormick, B., Allen, J., et al. (2008). Systems training for emotional predictability and problem solving (STEPPS) for outpatients with borderline personality disorder: A randomized controlled trial and 1-year follow-up. *American Journal of Psychiatry*, *165*, 468-478.
- Bohus M, Dyer AS, Priebe K, Krüger A, Kleindienst N, Schmahl C, et al. (2013) Dialectical behaviour therapy for post-traumatic stress disorder after childhood sexual abuse in patients with and without borderline personality disorder: a randomised controlled trial. *Psychotherapy and Psychosomatics*; 82(4):221–33.
- Bos, E. H., van Wel, E. B., Appelo, M. T., & Verbraak, M. J. P. M. (2010). A randomized controlled trial of a dutch version of systems training for emotional predictability and problem solving for borderline personality disorder. *Journal of Nervous and Mental Disease*, *198*, 299-304.
- Clarkin, J. F., Levy, K. N., Lenzenweger, M. F., & Kernberg, O. F. (2007). Evaluating three treatments for borderline personality disorder: A multiwave study. *American Journal of Psychiatry*, *164*, 922-928.
- Cottraux, J., Note, I., Yao, S., De Mey-Guillard, C., Bonasse, F., Djamoussian, D., et al. (2008). Randomized controlled comparison of cognitive behavior therapy with Rogerian supportive therapy in chronic post-traumatic stress disorder: A 2-year follow-up. *Psychotherapy and Psychosomatics*, *77*, 101-110.
- Davidson, K., Norrie, J., Tyrer, P., Gumley, A., Tata, P., Murray, H., et al. (2006). The effectiveness of cognitive behavior therapy for borderline personality disorder: results from the borderline personality disorder study of cognitive therapy (BOSCOT) trial. *Journal of Personality Disorders*, *20*, 450-465.
- Davidson, K., Tyrer, P., Gumley, A., Tata, P., Norrie, J., Palmer, S., et al. (2006). A randomized controlled trial of cognitive behavior therapy for borderline personality disorder: Rationale for trial, method, and description of sample. *Journal of Personality Disorders*, *20*, 431-449.
- Farrell, J. M., Shaw, I. A., & Webber, M. A. (2009). A schema-focused approach to group psychotherapy for outpatients with borderline personality disorder: A randomized controlled trial. *Journal of Behavior Therapy and Experimental Psychiatry*, *40*, 317-328.
- Giesen-Bloo, J., van Dyck, R., Spinhoven, P., van Tilburg, W., Dirksen, C., van Asselt, T., et al. (2006). Outpatient psychotherapy for borderline personality disorder: Randomized trial of Schema-focused Therapy vs. Transference-focused psychotherapy. *Archives of General Psychiatry*, *63*, 649–658.
- Gregory, R. J., Chlebowski, S., Kang, D., Remen, A. L., Soderberg, M. G., Stepkovitch, J., et al. (2008). A controlled trial of psychodynamic psychotherapy for co-occurring borderline personality disorder and alcohol use disorder. *Psychotherapy*, *45*, 28-41.
- Gregory, R. J., DeLucia-Deranja, E., & Mogle, J. A. (2010). Dynamic deconstructive psychotherapy versus optimized community care for borderline personality disorder co-occurring with alcohol use disorders: A 30-month follow-up. *Journal of Nervous and Mental Disease*, *198*, 292-298.

- Linehan, M. M., Comtois, K. A., Murray, A. M., Brown, M. Z., Gallop, R. J., & et al. (2006). Two-year randomized controlled trial and follow-up of dialectical behaviour therapy vs therapy by experts for suicidal behaviors and borderline personality disorder. *Archives of General Psychiatry*, 63, 757-766.
- Linehan MM, Korslund KE, Harned MS, Gallop RJ, Lungu A, Neacsiu AD, et al. (2015). Dialectical behavior therapy for high suicide risk in individuals with borderline personality disorder: a randomized clinical trial and component analysis. *JAMA Psychiatry*; 72(5):475–82.
- McMain, S. F., Links, P. S., Gnam, W. H., Guimond, T., Cardish, R. J., Korman, L., et al. (2009). A randomized trial of dialectical behavior therapy versus general psychiatric management for borderline personality disorder. *American Journal of Psychiatry*, 166, 1365-1374.
- Nadort, M., Arntz, A., Smit, J. H., Giesen-Bloo, J., Eikelenboom, M., Spinhoven, P., et al. (2009). Implementation of outpatient schema therapy for borderline personality disorder with versus without crisis support by the therapist outside office hours: A randomized trial. *Behavior Research and Therapy*, 47, 961-973.
- Nordahl, H.M. & Nysæter, T.E. (2005). Schema Therapy for Patients with Borderline personality disorder: A single case series. *Journal of Behaviour Therapy and Experimental Psychiatry*, 36, 254-264.
- Priebe S, Bhatti N, Barnicot K, Bremner S, Gaglia A, Katsakou C, et al.(2012). Effectiveness and cost-effectiveness of dialectical behavior therapy for self-harming patients with personality disorder: a pragmatic randomised controlled trial. *Psychotherapy and Psychosomatics*; 81(6):356–65.
- Soler, J., Pascual, J. C., Tiana, T., & et al. (2009). Dialectical behaviour therapy skills training compared to standard group therapy in borderline personality disorder: a 3-month randomized controlled clinical trial. *Behaviour Research and Therapy*, 47, 353-358.
- Weinberg, I., Gunderson, J. G., Hennen, J., & et al. (2006). Manual assisted cognitive treatment for deliberate self-harm in borderline personality disorder. *Journal of Personality Disorders*, 20, 482-492.
